# Supplementary material for: Bscl2 Deficiency Does Not Directly Impair the Innate Immune Response in a Murine Model of Generalized Lipodystrophy
Source: PubMed Central journal article supplement (PMC7865406; doi:10.3390/jcm10030441), 2021-01-23
Supplement: jcm-10-00441-s001.pdf [file jcm-10-00441-s001.pdf]

Supplementary Materials:

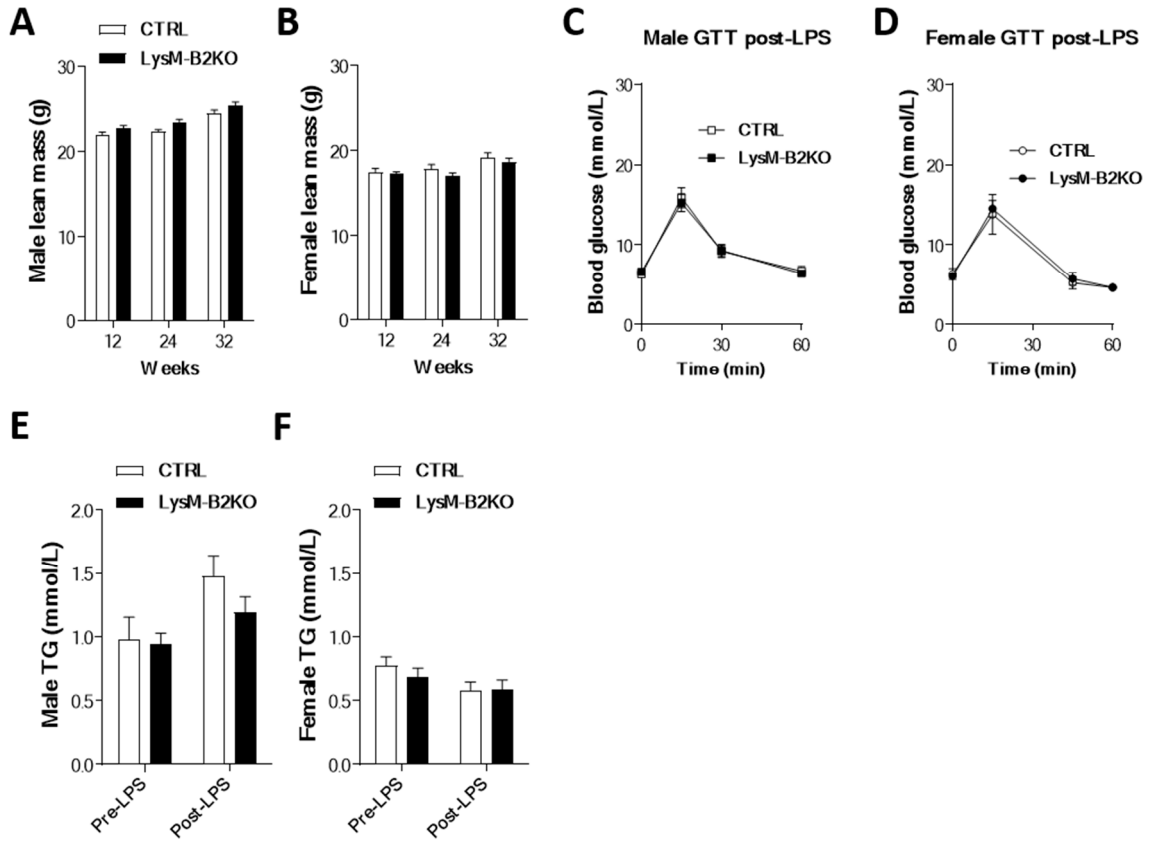

**Figure S1.** (A–B) Lean mass of male and female LysM-B2KO mice normalized to body weight (female  $n=5-7$ , male  $n=7-10$ ). (C–D) Glucose tolerance of LysM-B2KO mice at 32 weeks of age 3 hours following intraperitoneally injection of 1mg/kg LPS. (E–F) Analysis of serum triglycerides in LysM-B2KO mice fasted for 5 hours and subjected to LPS treatment. Data are represented as mean  $\pm$  SEM,  $p < 0.05$ .

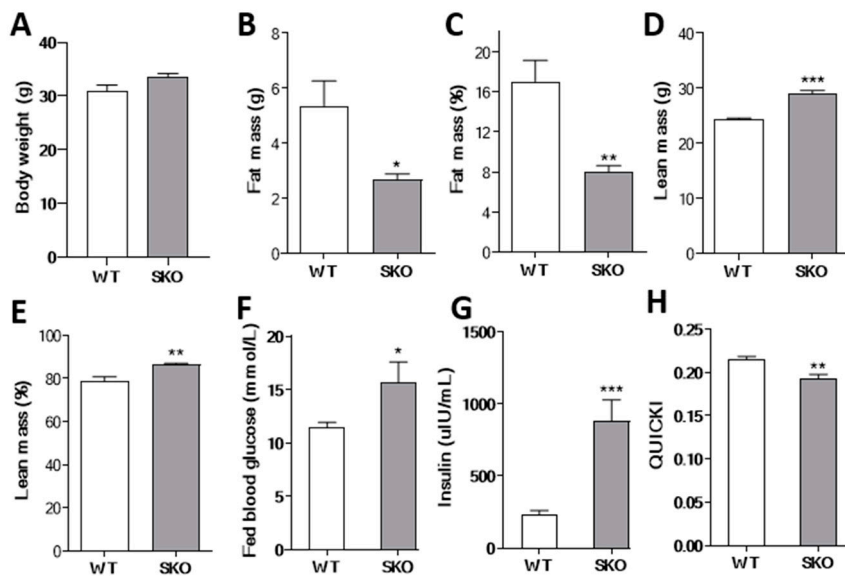

**Figure S2.** (A–E) Body composition of SKO mice. Body weight (A), fat mass (B–C) and lean mass (D–E) of male SKO mice at 16 weeks of age ( $n=5$ ). (F–H) Serum analysis of SKO mice. Random fed blood

glucose levels (F), insulin (G) and quantitative insulin sensitivity check index (QUICKI) (H) analysis in SKO mice fasted for 5 hours. Data are represented as mean  $\pm$  SEM, \* $p$ <0.05, \*\* $p$ <0.01, \*\*\* $p$ <0.001.

**Table S1.** Table showing sequences or supplier details of qPCR primers used in this study.

| <b>Primer</b>                    | <b>Sequence</b>                                    |
|----------------------------------|----------------------------------------------------|
| NoNo F<br>NoNo R                 | GCCAGAATGAAGGCTTGACTAT<br>TATCAGGGGGAAGATTGCCCA    |
| YWhaz F<br>YWhaz R               | GAAAAGTTCTTGATCCCCAATGC<br>TGTGACTGGTCCACAATTCCTT  |
| HPRT F<br>HPRT R                 | GTTAAGCAGTACAGCCCCAAA<br>AGGGCATATCCAACAACAACTT    |
| IL10 F<br>IL10 R                 | GCTCTTACTGACTGGCATGAG<br>CGCAGCTCTAGGAGCATGTG      |
| TNF $\alpha$ F<br>TNF $\alpha$ R | CCCTCACACTCAGATCATCTTCT<br>GCTACGACGTGGGCTACAG     |
| IL6 F<br>IL6 R                   | TAGTCCTTCTACCCCAATTTCC<br>TTGGTCCTTAGCCACTCCTTC    |
| IL1 $\alpha$ F<br>IL1 $\alpha$ R | GCACCTTACACCTACCAGAGT<br>AAACTTCTGCCTGACGAGCTT     |
| IL1 $\beta$ F<br>IL1 $\beta$ R   | GCAACTGTTCCTGAACTCAACT<br>ATCTTTTGGGGTCCGTCAACT    |
| iNOS F<br>iNOS R                 | GGAGTGACGGCAAACATGACT<br>TAGCCAGCGTACCGGATGA       |
| MCP1 F<br>MCP1 R                 | TTAAAAACCTGGATCGGAACCAA<br>GCATTAGCTTCAGATTTACGGGT |
| Bscl2 (TaqMan™ probes)           | ThermoFisher assay ID<br>#Mm01230976_m1            |
| 18s (TaqMan™ probes)             | ThermoFisher assay ID<br>#Mm03928990_g1            |
